# Supplementary material for: Steroid Metabolome Analysis in Dichorionic Diamniotic Twin Pregnancy
Source: Preprints.org preprint supplement (doi:10.20944/preprints202312.0027.v1), 2023-12-01
Supplement: Supplementary file 5 [file Table Supplement 4.docx]

| **Supplementary Table 4.** Steroid differences between female and male foetuses in umbilical arterial blood | | | | |
| --- | --- | --- | --- | --- |
| **Steroid** | **Female** | **Male** | **p** | **ηp2** |
| 5-Androstene-3β,16α,17β-triol sulfate [nM] | 461 (404, 527) | 629 (541, 736) | 0.039 | 0.113 |
| 17,20α-Dihydroxy-4-pregnene-3-one [nM] | 13.4 (11.3, 15.9) | 8.59 (7.14, 10.4) | 0.021 | 0.137 |
| Androstenedione [nM] | 3.1 (2.67, 3.61) | 2.19 (1.86, 2.58) | 0.036 | 0.116 |
| Testosterone [pM] | 92 (45.8, 173) | 705 (354, 1430) | 0.005 | 0.198 |
| 16α-Hydroxytestosterone [nM] | 12.9 (10.6, 15.6) | 7.51 (5.95, 9.39) | 0.017 | 0.148 |
| 5α-Dihydrotestosterone [pM] | 35.9 (22.2, 56.6) | 98.4 (59.9, 161) | 0.046 | 0.103 |
| 5β-Pregnane-3α,17,20α-triol [nM] | 2.34 (2.09, 2.63) | 1.46 (1.3, 1.65) | <0.001 | 0.291 |
| 5β-Pregnane-3α,17,20α-triol, conjugated [nM] | 592 (476, 751) | 307 (249, 384) | 0.007 | 0.184 |
| Etiocholanolone [pM] | 55 (47.8, 62.8) | 30.7 (25.1, 37) | 0.001 | 0.25 |
| 11β-Hydroxyandrostenedione [nM] | 9.67 (8.02, 11.7) | 6.14 (4.99, 7.56) | 0.031 | 0.12 |
| 3α,5β-Tetrahydrocorticosterone [nM] | 2.13 (1.65, 2.72) | 1.13 (0.841, 1.49) | 0.025 | 0.139 |
| *The differences between twin and singleton pregnancies for each steroid were evaluated using a linear model consisting of factors Pregnancy type (Twin vs. Singleton) and Gender (Male vs. Female) adjusted for maternal age and gestational age at labour. Significant differences (p<0.05) are in bold, p…p-value, ηp2…effect size (0.01 ~ small, 0.06 ~ medium, >0.14 ~ large)* | | | | |
