# Supplementary material for: Steroid Metabolome Analysis in Dichorionic Diamniotic Twin Pregnancy
Source: Preprints.org preprint supplement (doi:10.20944/preprints202312.0027.v1), 2023-12-01
Supplement: Supplementary file 6 [file Table Supplement 5.docx]

| **Supplementary Table 5.** Steroid differences between female and male foetuses in umbilical venous blood | | | | |
| --- | --- | --- | --- | --- |
| **Steroid** | **Female** | **Male** | *p* | *ηp2* |
| 5-Androstene-3β,16α,17β-triol sulfate [nM] | 414 (359, 476) | 669 (583, 768) | 0.001 | 0.209 |
| Testosterone [pM] | 28.1 (17.8, 43.5) | 115 (71.9, 194) | 0.003 | 0.175 |
| Estrone [nM] | 54.6 (44.5, 65.7) | 27.7 (20.2, 36.3) | 0.006 | 0.146 |
| 5β-Pregnane-3α,17,20α-triol [nM] | 2.21 (1.96, 2.48) | 1.51 (1.32, 1.72) | 0.004 | 0.171 |
| 5β-Pregnane-3α,17,20α-triol, conjugated [nM] | 667 (505, 898) | 300 (233, 390) | 0.005 | 0.154 |
| 5α-Androstane-3,17-dione [nM] | 0.224 (0.189, 0.27) | 0.156 (0.134, 0.184) | 0.034 | 0.092 |
| Androsterone [nM] | 144 (121, 173) | 91.3 (78.6, 107) | 0.007 | 0.148 |
| Etiocholanolone [pM] | 54.6 (47.1, 63.5) | 36.6 (31.6, 42.5) | 0.01 | 0.137 |
| 5α-Androstane-3β,17β-diol,conjugated [nM] | 5.46 (4.67, 6.38) | 7.64 (6.5, 8.97) | 0.04 | 0.086 |
| Cortisol [nM] | 129 (117, 144) | 100 (89.6, 112) | 0.024 | 0.103 |
| Cortisone [nM] | 200 (179, 224) | 160 (143, 179) | 0.048 | 0.079 |
| 11β-Hydroxyandrostenedione [nM] | 6.65 (5.5, 8.05) | 4.5 (3.72, 5.45) | 0.044 | 0.083 |
| *The differences between twin and singleton pregnancies for each steroid were evaluated using a linear model consisting of factors Pregnancy type (Twin vs. Singleton) and Gender (Male vs. Female) adjusted for maternal age and gestational age at labour. Significant differences (p<0.05) are in bold, p…p-value, ηp2…effect size (0.01 ~ small, 0.06 ~ medium, >0.14 ~ large)* | | | | |
