# Supplementary material for: Steroid Metabolome Analysis in Dichorionic Diamniotic Twin Pregnancy
Source: Preprints.org preprint supplement (doi:10.20944/preprints202312.0027.v1), 2023-12-01
Supplement: Supplementary file 7 [file Table Supplement 6.docx]

| **Supplementary Table 6.** Steroid differences between female and male foetuses in maternal venous blood | | | | |
| --- | --- | --- | --- | --- |
| **Steroid** | **Female** | **Male** | *p* | *ηp2* |
| 5-Androstene-3β,7β,17β-triol [pM] | 207 (143, 297) | 56.6 (33.8, 91) | 0.006 | 0.238 |
| 16α-Hydroxyprogesterone [nM] | 28.2 (24.4, 32.7) | 42.1 (34.5, 52.2) | 0.037 | 0.147 |
| Estrone [nM] | 28 (22.4, 35.1) | 14.8 (11.3, 19.2) | 0.017 | 0.18 |
| Estrone sulfate [nM] | 258 (201, 324) | 447 (354, 554) | 0.031 | 0.155 |
| Estradiol [nM] | 113 (98.8, 129) | 75.4 (64.6, 88) | 0.012 | 0.203 |
| Epipregnanolone, conjugated [nM] | 186 (151, 229) | 349 (266, 462) | 0.019 | 0.183 |
| 5β-Pregnane-3α,17,20α-triol [nM] | 6.91 (5.93, 8.04) | 4.37 (3.56, 5.31) | 0.017 | 0.18 |
| 5β-Pregnane-3α,17,20α-triol, conjugated [nM] | 562 (462, 693) | 304 (246, 378) | 0.007 | 0.184 |
| Androsterone [nM] | 0.696 (0.575, 0.855) | 0.441 (0.36, 0.546) | 0.04 | 0.138 |
| Androsterone sulfate [nM] | 321 (252, 408) | 169 (122, 229) | 0.031 | 0.155 |
| Epiandrosterone [nM] | 0.411 (0.317, 0.536) | 0.19 (0.14, 0.257) | 0.014 | 0.196 |
| Epiandrosterone sulfate [nM] | 86 (70.1, 106) | 53 (41.9, 67) | 0.043 | 0.139 |
| Etiocholanolone [pM] | 185 (160, 215) | 131 (110, 156) | 0.049 | 0.127 |
| 5α-Androstane-3α,17β-diol [pM] | 98.5 (78.7, 126) | 59.6 (47.7, 75.7) | 0.05 | 0.131 |
| 11β-Hydroxyandrosterone [pM] | 195 (162, 235) | 312 (248, 395) | 0.043 | 0.144 |
| *The differences between twin and singleton pregnancies for each steroid were evaluated using a linear model consisting of factors Pregnancy type (Twin vs. Singleton) and Gender (Male vs. Female) adjusted for maternal age and gestational age at labour. Significant differences (p<0.05) are in bold, p…p-value, ηp2…effect size (0.01 ~ small, 0.06 ~ medium, >0.14 ~ large)* | | | | |
